# Supplementary material
Source: PubMed Central journal article supplement (PMC3126484)
Supplement: supp_85_13_6403__1.pdf [file supp_85_13_6403__1.pdf]

**Supplementary Table 1.** Number of viruses with different combinations of mutations on ART and after treatment interruption.

| Days from treatment interruption in PID811 |     |    |    |     |     |     |
|--------------------------------------------|-----|----|----|-----|-----|-----|
| No. of mutations                           | -70 | 21 | 63 | 105 | 168 | 224 |
| 6                                          | 0   | 1  | 1  | 0   | 0   | 0   |
| 5                                          | 0   | 9  | 8  | 0   | 0   | 0   |
| 4                                          | 3   | 52 | 90 | 18  | 0   | 0   |
| 3                                          | 5   | 44 | 96 | 71  | 0   | 0   |
| 2                                          | 0   | 8  | 67 | 27  | 2   | 1   |
| 1                                          | 1   | 9  | 8  | 42  | 15  | 222 |
| 0                                          | 0   | 0  | 2  | 195 | 225 | 599 |

| Days from treatment interruption in PID908 |     |     |     |
|--------------------------------------------|-----|-----|-----|
|                                            | -14 | 42  | 77  |
| 6                                          | 11  | 13  | 0   |
| 5                                          | 9   | 15  | 0   |
| 4                                          | 75  | 186 | 0   |
| 3                                          | 19  | 303 | 12  |
| 2                                          | 1   | 371 | 39  |
| 1                                          | 9   | 565 | 707 |
| 0                                          | 0   | 5   | 461 |

| Days from treatment interruption in PID268 |    |     |     |      |
|--------------------------------------------|----|-----|-----|------|
|                                            | 0  | 238 | 287 | 364  |
| 6                                          | 0  | 0   | 0   | 0    |
| 5                                          | 0  | 0   | 0   | 0    |
| 4                                          | 0  | 0   | 0   | 0    |
| 3                                          | 0  | 0   | 0   | 0    |
| 2                                          | 15 | 7   | 0   | 0    |
| 1                                          | 0  | 149 | 144 | 15   |
| 0                                          | 0  | 397 | 844 | 1152 |

| Days from treatment interruption in PID895 |      |      |      |      |      |
|--------------------------------------------|------|------|------|------|------|
|                                            | -427 | 63   | 196  | 357  | 413  |
| 6                                          | 0    | 0    | 0    | 0    | 0    |
| 5                                          | 0    | 0    | 0    | 0    | 0    |
| 4                                          | 0    | 0    | 0    | 0    | 0    |
| 3                                          | 0    | 0    | 0    | 0    | 0    |
| 2                                          | 0    | 0    | 0    | 0    | 0    |
| 1                                          | 0    | 12   | 10   | 27   | 6    |
| 0                                          | 1    | 2941 | 1762 | 4323 | 1153 |

Treatment was interrupted at day 0.
